# Supplementary material
Source: ML conference proceedings conference paper supplement (https://proceedings.neurips.cc/paper_files/paper/2010/hash/e0c641195b27425bb056ac56f8953d24-Abstract.html)
Supplement: Supplementary file 1 [file e0c641195b27425bb056ac56f8953d24-Supplemental.zip]

### A Proof of Lemma 3

*Proof.* From the strict convexity of  $J(\eta)$  it follows that  $J'(\eta)$  has positive derivative for all  $\eta$ . Hence,  $J'(\eta)$  is invertible. From the symmetry of  $J(\eta)$ ,

$$J'(\eta) = -J'(1 - \eta)$$

and, for any  $v$  such that  $\eta = [J']^{-1}(v)$ ,

$$\begin{aligned} v &= -J'(1 - [J']^{-1}(v)) \\ [J']^{-1}(-v) &= 1 - [J']^{-1}(v). \end{aligned}$$

□

### B Proof of Theorem 4

*Proof.* Given that  $C_\phi(\eta, f)$  is a canonical risk and (16), the loss function of (14) can be simplified to

$$\begin{aligned} \phi(v) &= -J[f^{-1}(v)] - (1 - f^{-1}(v))J'[f^{-1}(v)] \\ &= -J\{[J']^{-1}(v)\} - (1 - [J']^{-1}(v))J'\{[J']^{-1}(v)\} \\ &= -J\{[J']^{-1}(v)\} - (1 - [J']^{-1}(v))v. \end{aligned}$$

The proof follows from taking derivatives on both sides,

$$\begin{aligned} \phi'(v) &= -J'\{[J']^{-1}(v)\}\{[J']^{-1}\}'(v) - (1 - [J']^{-1}(v)) + \{[J']^{-1}\}'(v)v \\ &= -v\{[J']^{-1}\}'(v) - (1 - [J']^{-1}(v)) + \{[J']^{-1}\}'(v)v \\ &= -(1 - [J']^{-1}(v)) \\ &= -[J']^{-1}(-v), \end{aligned}$$

where we have also used (15). Furthermore, using (16),

$$\phi'(v) = -(1 - [J']^{-1}(v)) \tag{32}$$

$$= -(1 - [f^*]^{-1}(v)) \tag{33}$$

$$= [f^*]^{-1}(v) - 1. \tag{34}$$

□
