# Supplementary material
Source: ML conference proceedings conference paper supplement (https://proceedings.neurips.cc/paper_files/paper/2010/hash/e0c641195b27425bb056ac56f8953d24-Abstract.html)
Supplement: Supplementary file 2 [file e0c641195b27425bb056ac56f8953d24-Supplemental.zip]

Archive with 1 entries (1 files):
- extra/NIPS2010_0421_extra.pdf
